# Supplementary material for: Epitaxial growth of silver chloride crystals on bismuth oxychloride
Source: Royal Society of Chemistry journal article supplement (doi:10.1039/c4dt02666g), 2014-10-13
Supplement: c4dt02666g1.pdf [file c4dt02666g1.pdf]

**SUPPORTING INFORMATION FOR:**

**Epitaxial growth of silver chloride crystals on bismuth oxychloride**

Boris B. Bokhonov

Institute of Solid State Chemistry, Siberian Branch, Russian Academy Sciences, Kutateladze 18, 630128 Novosibirsk, Russia

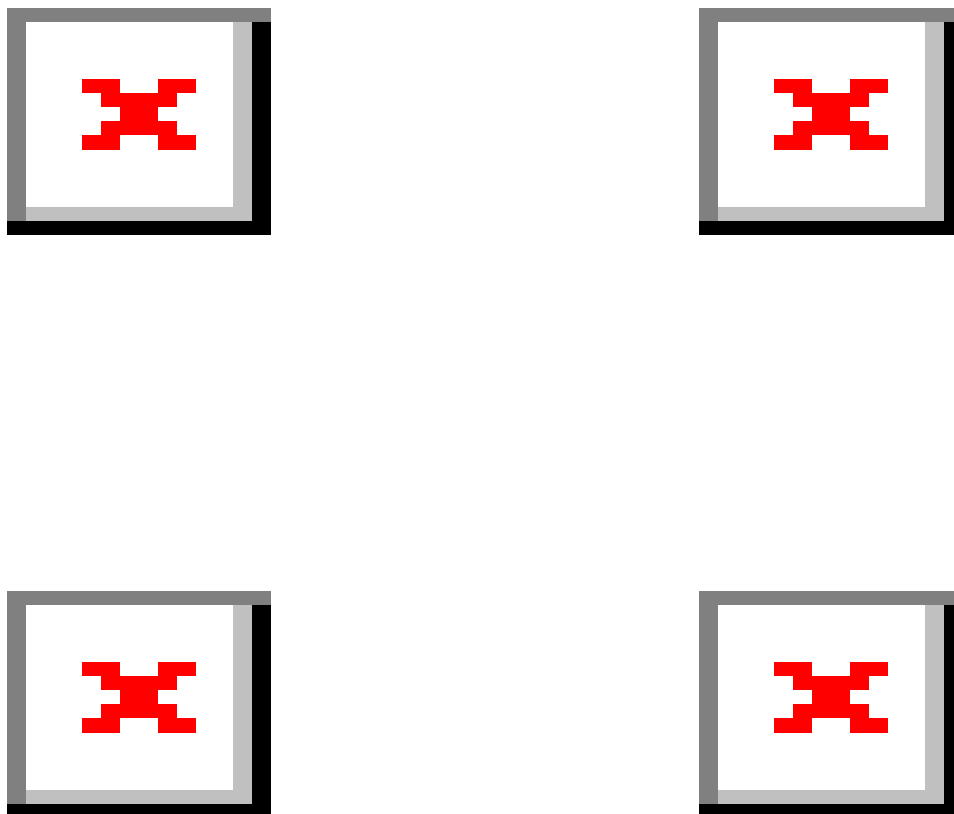

Figure 1S. SEM images of degradation of BiOCl/AgCl heterostructures during electromicroscopic investigation (a) -30s, (b) -120s, (c) -180s, (d) -240s.

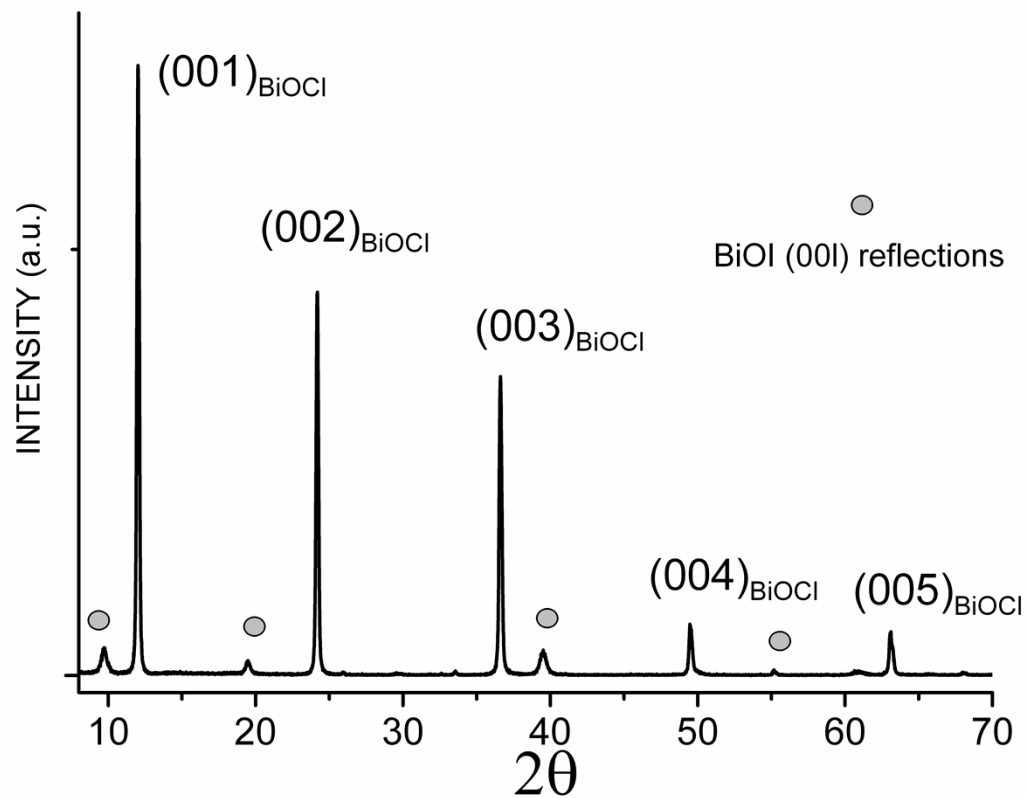

Figure 2S. The XRD patterns of the reaction products of the BiOCl crystals treated by NaI solution show reflections of the BiOI phase along with those of the BiOCl phase.

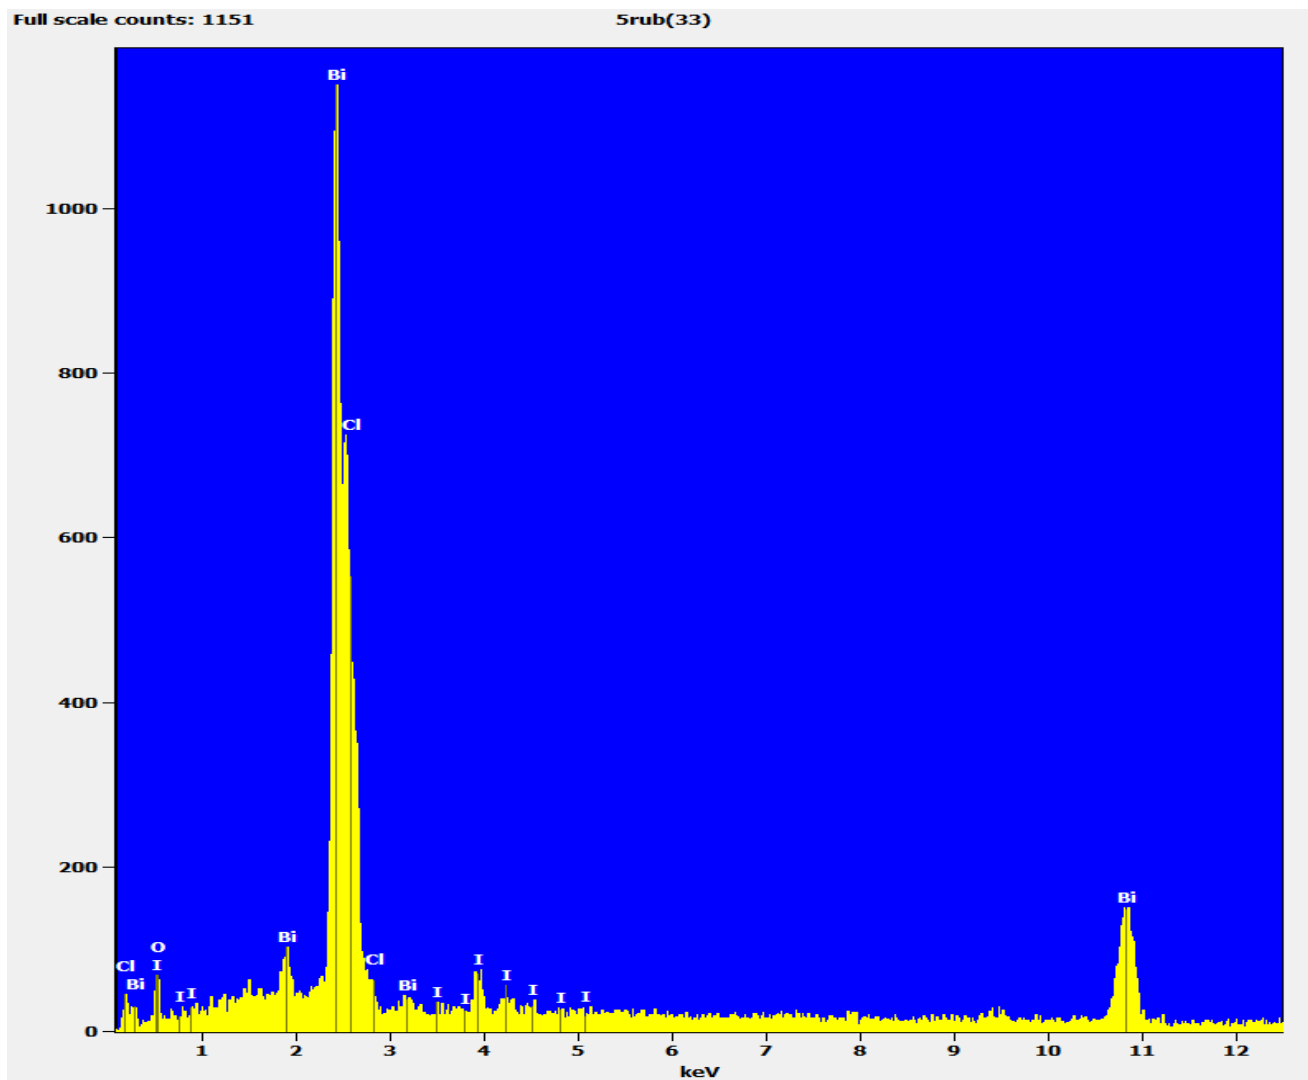

Figure 3S. The EDS spectrum of the BiOCl crystals treated by NaI solution.
